# Supplementary material for: Comprehensive study of mtDNA among Southwest Asian dogs contradicts independent domestication of wolf, but implies dog–wolf hybridization
Source: PubMed Central journal article supplement (PMC3287314; doi:10.1002/ece3.35), 2011-11

Figure S2: Topology of the MS networks and the sub-haplogroups, with haplotype numbers shown. Haplotypes with grey shade were left unassigned to sub-haplogroups, based on the diagnostic point mutations (Pang *et al.* 2009). See Figure 3 for more explanations.

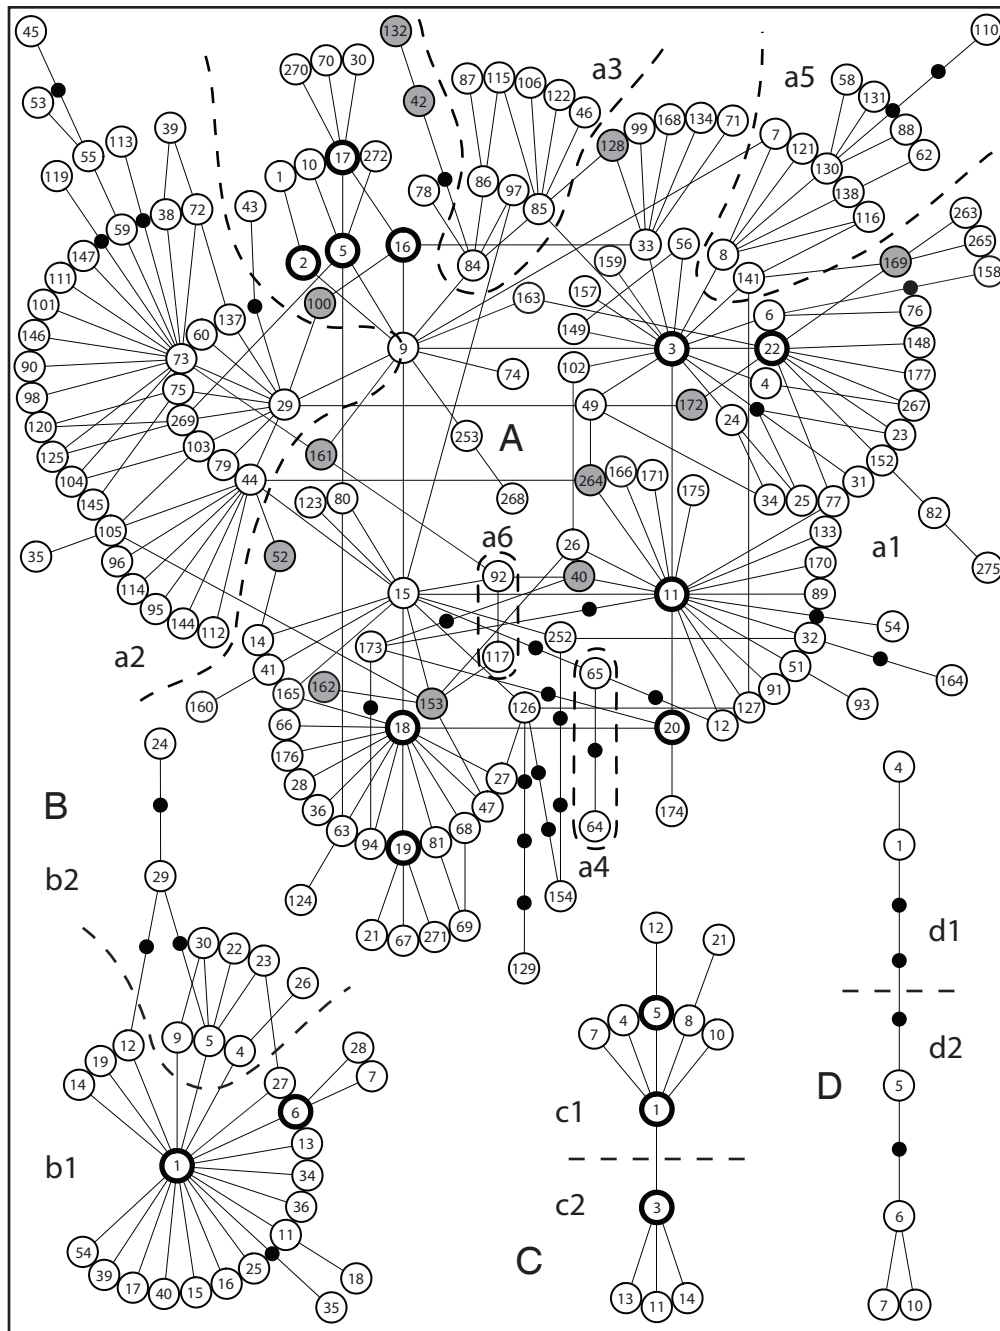

Supplement: ece30001-0373-SD4.pdf [file ece30001-0373-SD4.pdf]
